# Supplementary material
Source: HighWire-hosted journal article supplement (https://bmjopenquality.bmj.com/content/12/3/e002035)
Supplement: inline-supplementary-material-5 [file inline-supplementary-material-5.pdf]

# Baseline questionnaire

## Samlet status

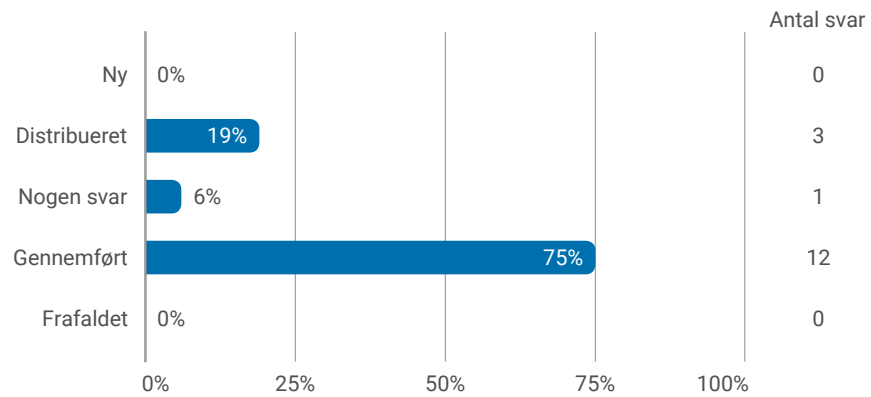

## Hvor mange uger har du været tilknyttet afdelingen grundet hyperemesis gravidarum?

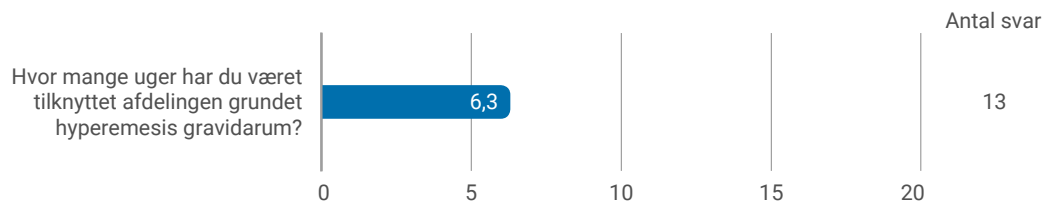

## Hvor tilfreds er du overordnet med dit forløb grundet hyperemesis gravidarum her på hospitalet?

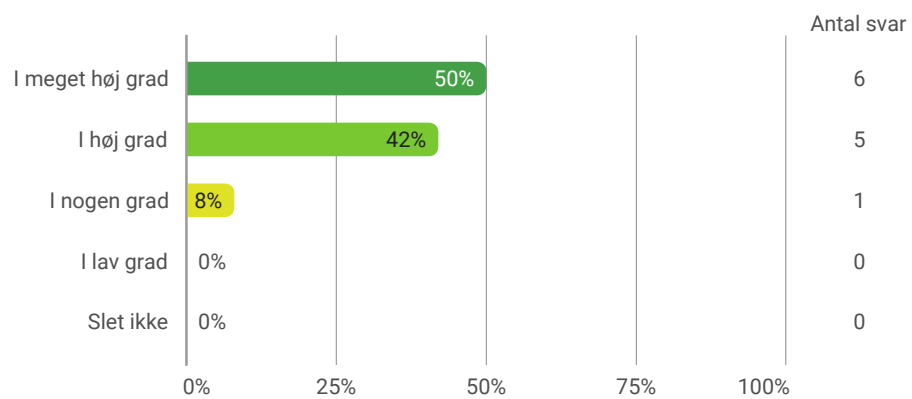

## Er personalet venligt og imødekommende?

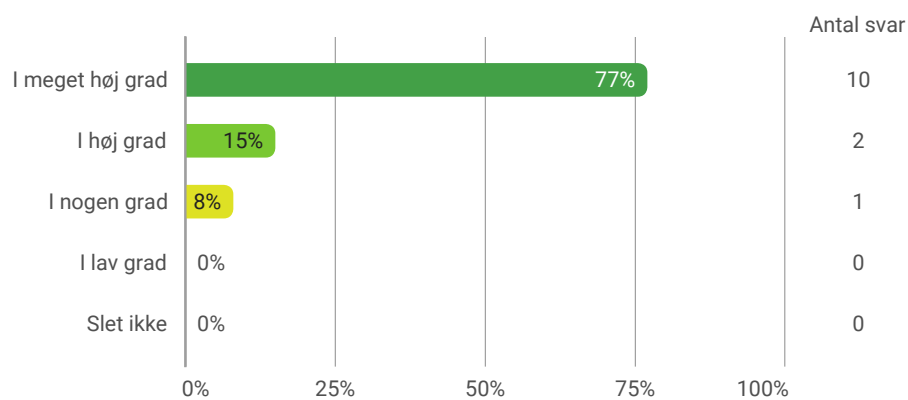

## Har personalet givet dig tilstrækkelig information til, at du er tryk ved tiden efter dit besøg/indlæggelse?

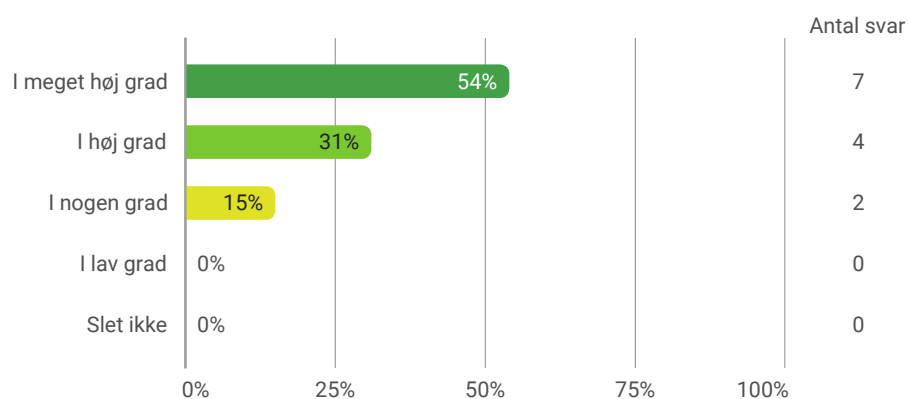

## Oplever du entydig information fra personalet?

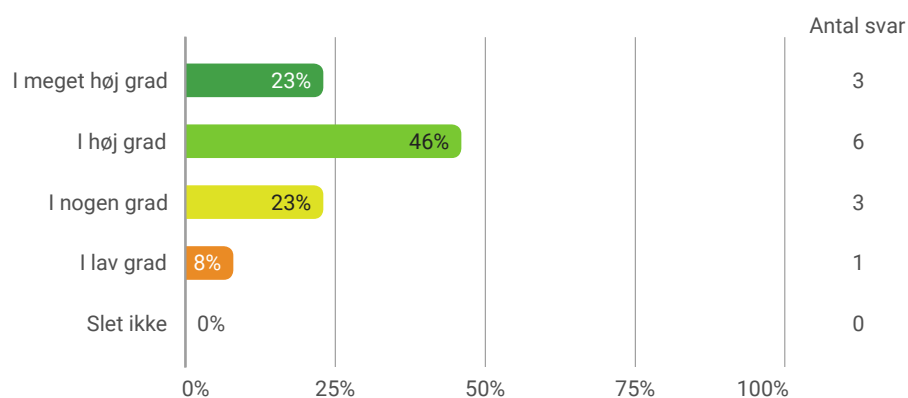

## Har du oplevet, at der lå en klar behandlingsplan?

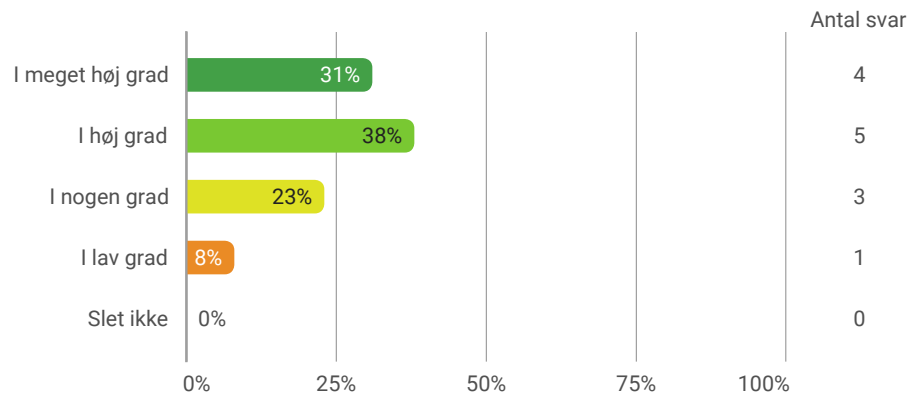

## Startede dit hospitalsforløb med, at du blev set i Gynækologisk ambulatorie af en læge og sygeplejerske, hvor du bl.a. blev skannet?

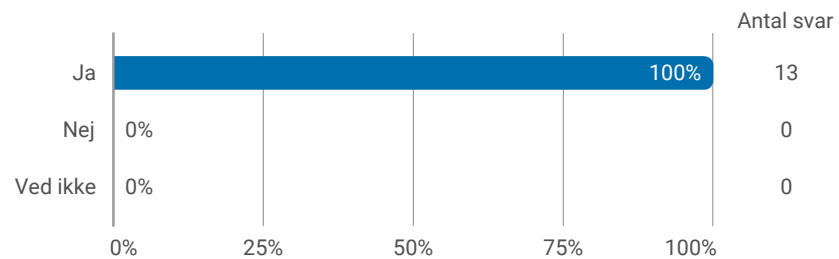

## Hvor tilfreds var du med det første besøg?

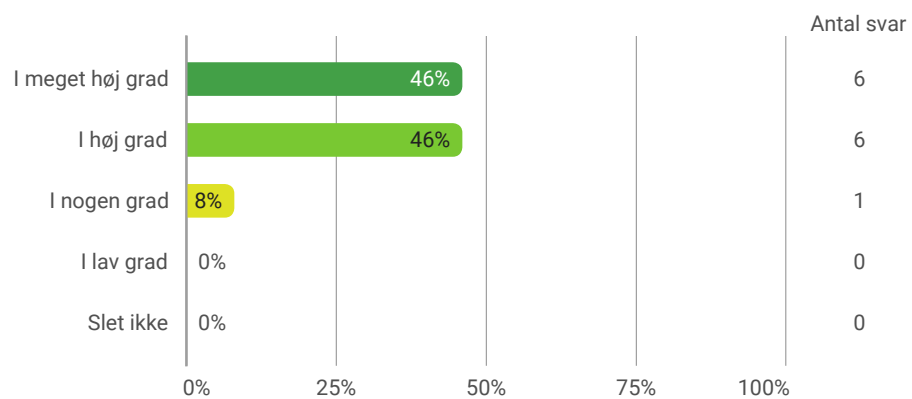

## Oplevede du, at lægen/lægerne i ambulatoriet var kompetente?

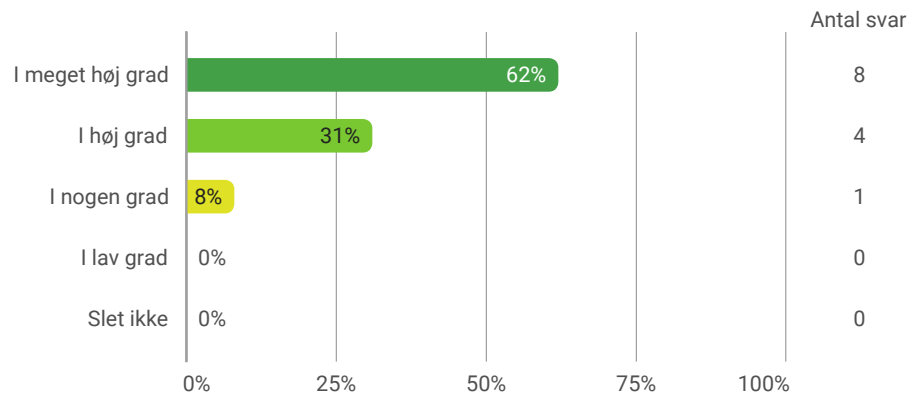

## Oplevede du, at sygeplejersken/sygeplejerskerne i ambulatoriet var kompetente?

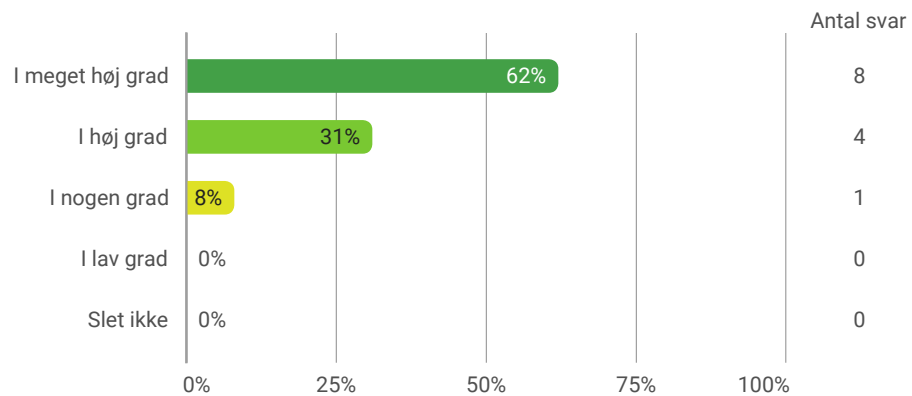

## Spurgte personalet ind til din beskrivelse af din sygdom/tilstand?

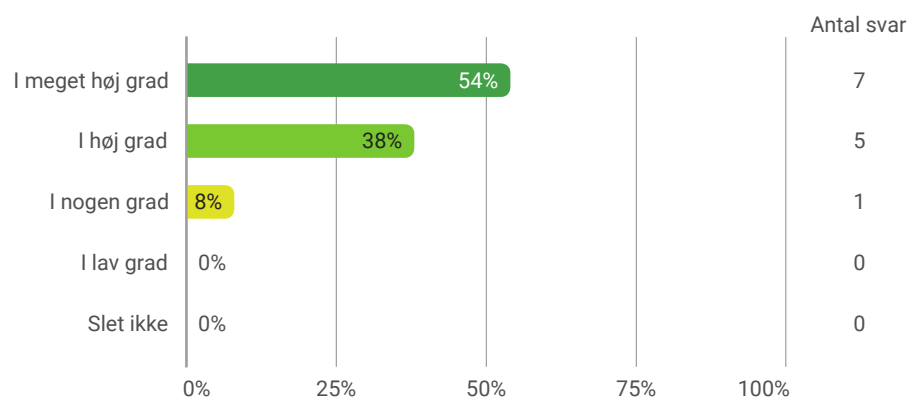

Var du med til at træffe beslutninger om din undersøgelse/behandling i det omfang, du havde behov for?

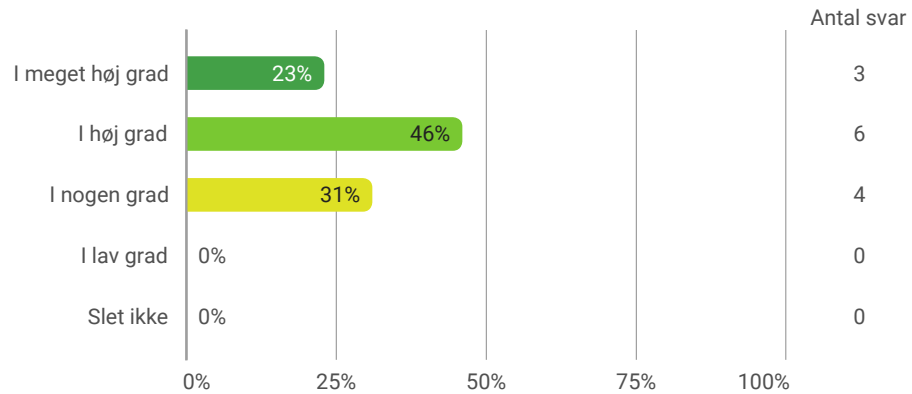

Fik du alle de informationer, du havde behov for?

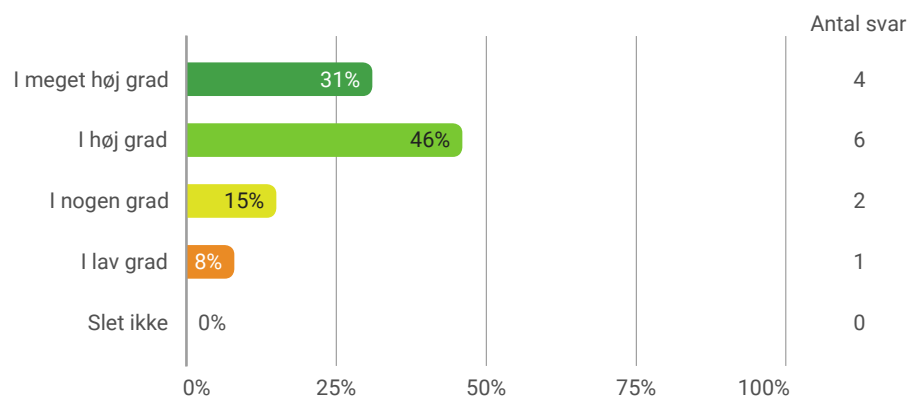

Var den mundtlige information, du fik under dit besøg, forståelig?

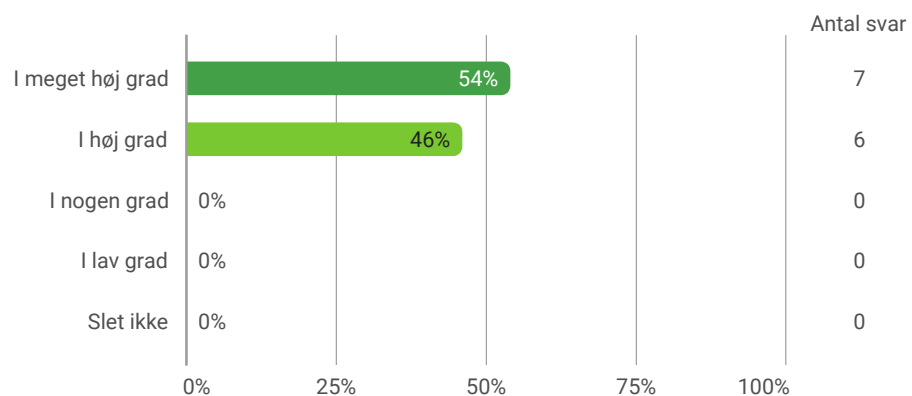

## Oplever du, at afdelingens jordemødre er kompetente?

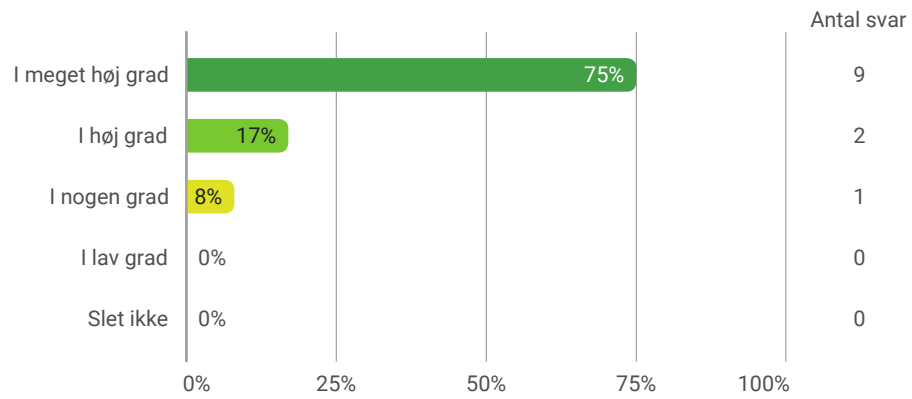

## Oplever du, at afdelingens læger er kompetente?

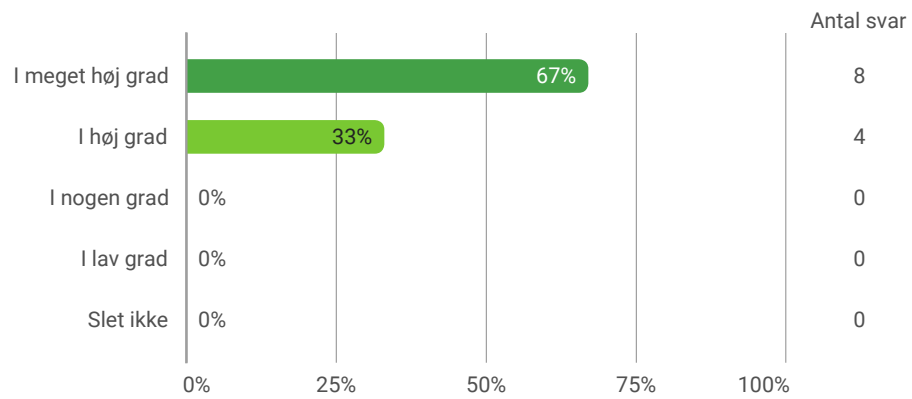

## Spørger personalet ind til din beskrivelse af din sygdom/tilstand?

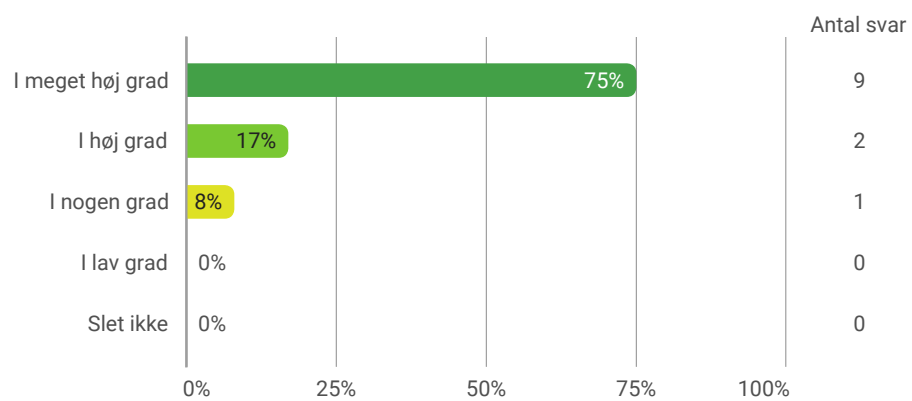

Har du været med til at træffe beslutninger om din undersøgelse/behandling i det omfang, du har haft behov for?

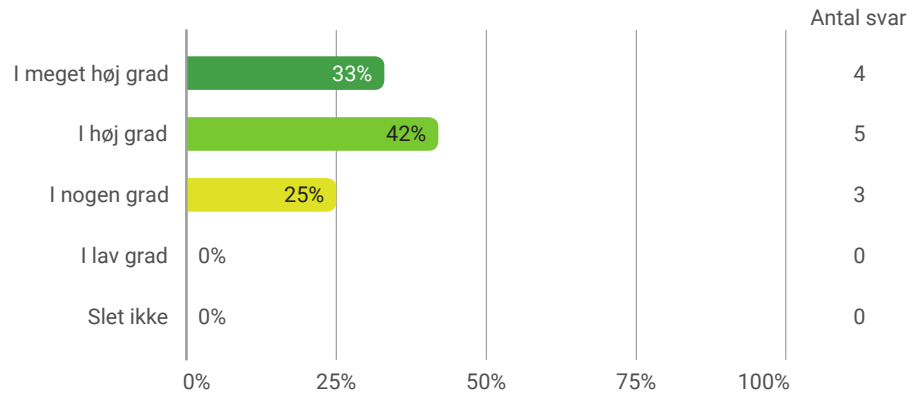

Har du fået alle de informationer, du har haft behov for?

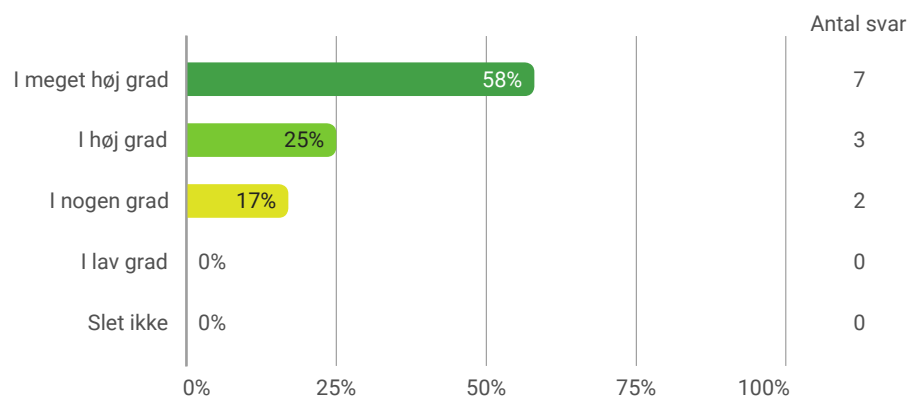

Har den mundtlige information, du har fået under dit forløb, været forståelig?

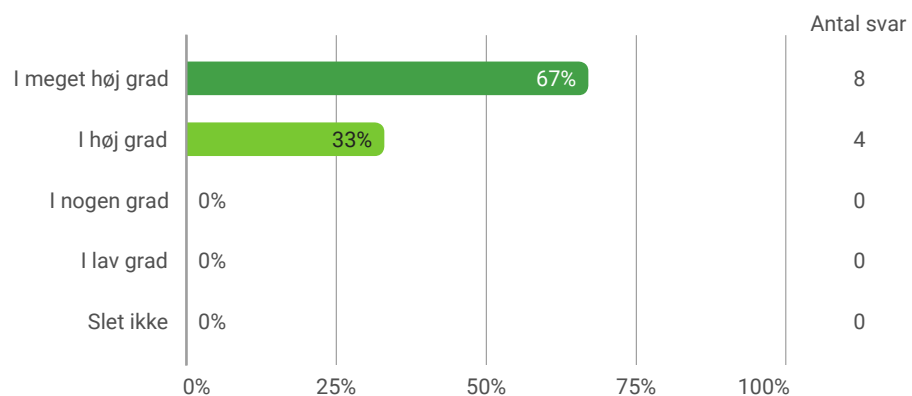

**Hvis du har kommentarer eller forslag til forbedring/ændring af behandlingen af hyperemesis gravidarum på Nordsjællands Hospital Hillerød, kan du skrive det her:**

Jeg har nu været ramt af kvalme i 1 måned og startede hos egen læge. Blev først henvist til hospitalet efter 3 uger, da jeg havde prøvet alt der var at prøve uden held. På hospitalet fik jeg så at vide at man ikke kunne gøre mere. Det er fint at jeg nu er tilknyttet det her forløb hvor jeg bliver ringet op. Men jeg er stadig syg og der er stadig ikke noget der har hjulpet, jeg ved ikke hvad dette forløb kan, som min egen læge ikke har kunnet. Det kunne måske være rart hvis egen læge kunne henvise til dette forløb med det samme, i stedet for at der skal gå så lang tid. Så kan man måske få et mere sammenhængende forløb.

Jeg har desværre oplevet med forskellig og til tider modsigende information fra jordmødre og læger, når jeg kommer andre dage end tirsdag og torsdag. Jeg har derudover oplevet at jordmødre ikke har vidst tilstrækkeligt om HG på andre dage. Det kan være meget stressende for en hg patient, der har det rigtig skidt, fx at få at vide under en indlæggelse "går du ikke på arbejde?! Så er det da klart du har det dårligt, hvis du bare ligger derhjemme og sumper. Du burde tage hjem og få noget rigtig lækker mad og gå nogle gode ture"

Jeg oplever desuden at min "plan" skifter hver gang det er en ny læge, jeg har haft indover. Den bliver derved tiden lavet om, inden den rigtigt når igang. Særligt af læger der ikke er tilknyttet hg teamet.

Grunden til, at I ikke får højeste score i det ene spørgsmål er, at det kommer meget an på hvem jeg snakker med (telefonisk) om jeg bør forsøge at trappe ud af ondansetron eller ej. Jeg ved, at det ikke er optimalt at være på ondansetron, men hvis jeg har det acceptabelt på min dosis, og har fået det værre af at sætte dosis ned, så er jeg ikke så villig til at 'eksperimentere' med dosis, som jeg indimellem er blevet foreslået.

Flyt HG-patienter til en anden afdeling hvor der er tid til os. Vi hører ikke til en akut modtagelse. Oplever tit ventetid, ingen forståelse for vores tilstand. Følte mig som en belastning for systemet.

Behandlingen under mit forløb har været med til at gøre mig opkast- og kvalmefri, hvilket jeg er ovenud lykkelig for!

Bedre koordinering mellem afdelingerne ift blodprøvetagning. Jeg kunne først få tid til blodprøve efter min lægekonsultation, hvorfor jeg ikke har talt med en læge om mine blodprøveresultater.

**Har du henvendt dig til din praktiserende læge angående graviditeskvalme/hyperemesis gravidarum?**

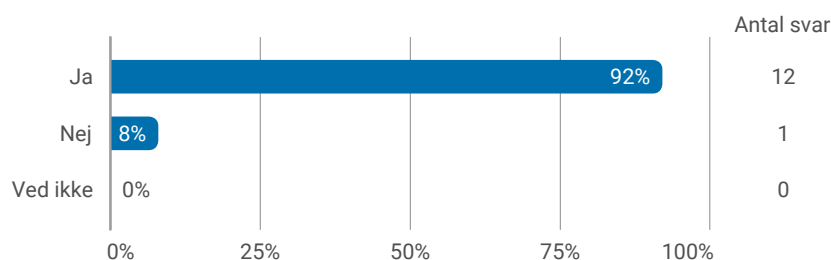

**Hvis du kan uddybe, hvorfor du ikke har henvendt dig til din praktiserende læge grundet graviditeskvalme/hyperemesis gravidarum, bedes du gøre det her:**

Jeg har prøvet det i tidligere graviditeter, og viste derfor det gav bedst mening at kontakte afdelingen i Hillerød direkte



Hvor tilfreds var du overordnet med din kontakt til din praktiserende læge grundet graviditetskvalme/ hyperemesis gravidarum?

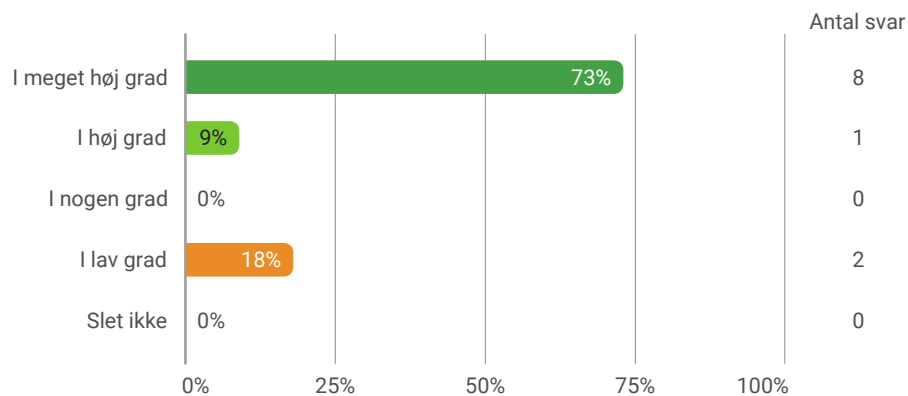

Oplevede du, at din praktiserende læge var kompetent i forhold til graviditetskvalme/hyperemesis gravidarum?

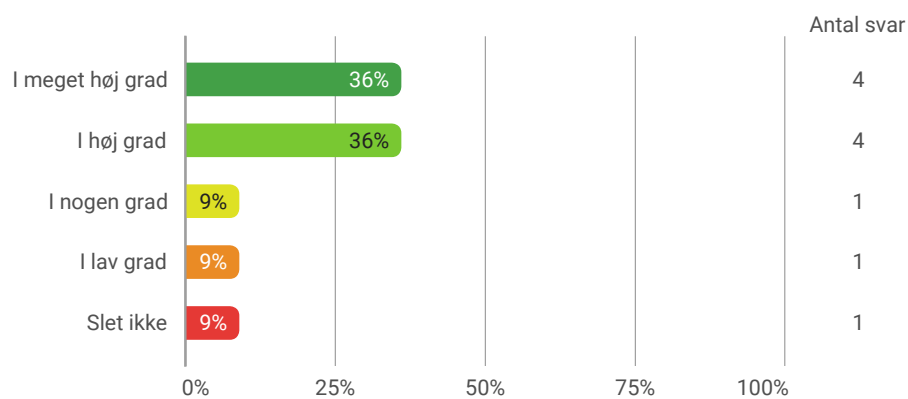

Spurgte han/hun ind til din beskrivelse af din sygdom/tilstand?

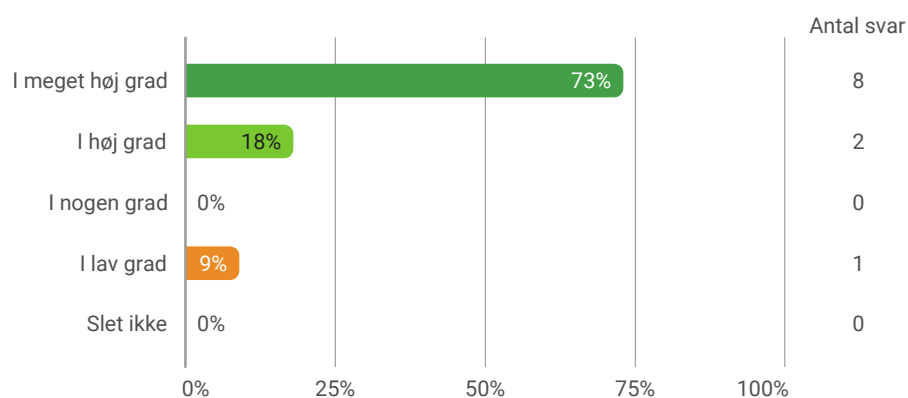

Var du med til at træffe beslutninger om din undersøgelse/behandling i det omfang, du havde behov for?

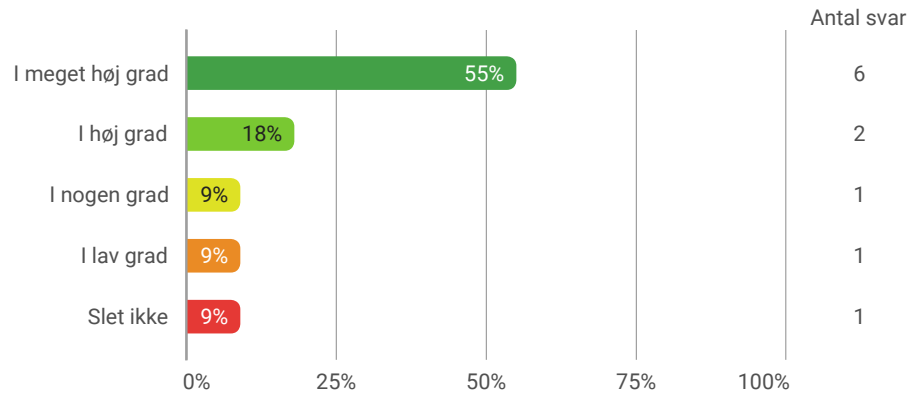

Fik du alle de informationer, du havde behov for?

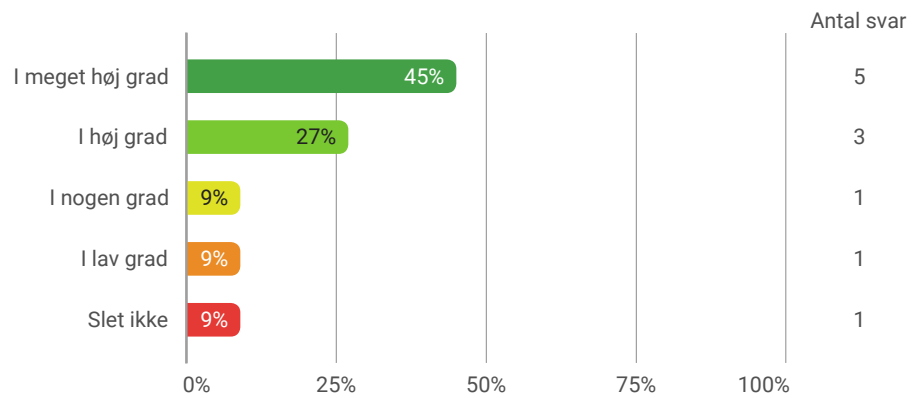

Var den mundtlige information, du fik, forståelig?

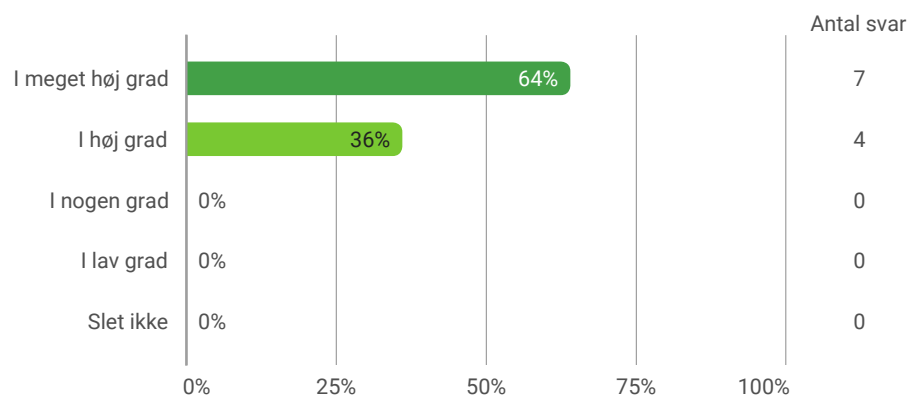

Gav din praktiserende læge dig tilstrækkelig information til, at du var tryk ved tiden efter dit besøg?

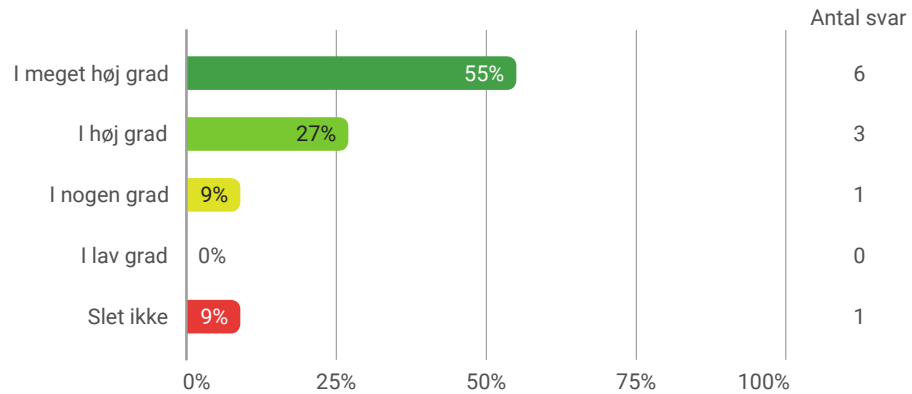

Oplevede du, at der lå en klar behandlingsplan efter dit besøg hos din praktiserende læge?

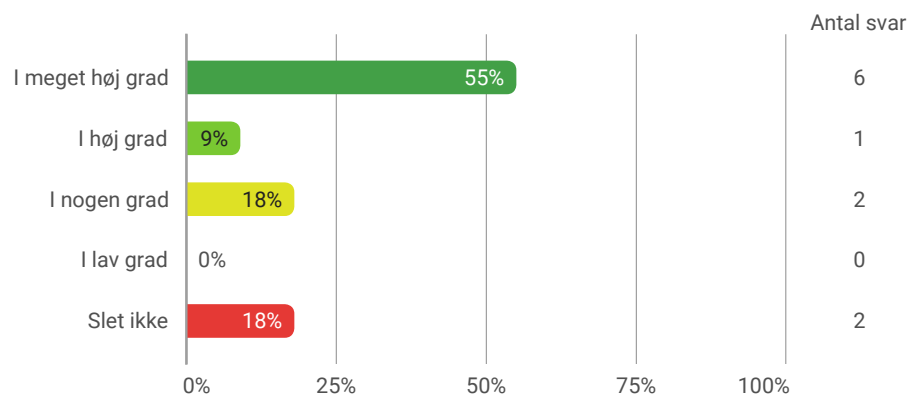

Startede du kvalmestillende medicin efter vejledning/recept fra din praktiserende læge?

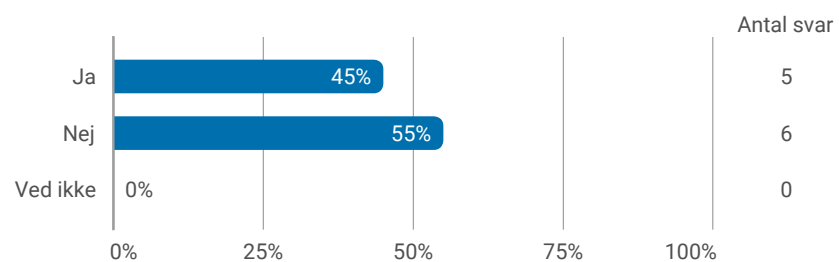

| Hvilken kvalmestillende medicin startede du efter vejledning/recept fra din praktiserende læge?                                                                       |
|-----------------------------------------------------------------------------------------------------------------------------------------------------------------------|
| Startede med postafen og B6 vitamin. Da det ikke virkede fik jeg phenergan og B6, da det ikke virkede fik jeg postafen, B6 og metoclopramide. Det virkede heller ikke |
| Ondansetron, da jeg har dn tidligere hg graviditet bag mig, hvor de andre præparater ikke var tilstrækkelige                                                          |
| Metoclopramide                                                                                                                                                        |
| Kan ikke huske navnet på præparatet, men det var noget antihistamin som ikke gav nogen effekt.                                                                        |
| B6                                                                                                                                                                    |

### Blev du henvist til hospitalet af din praktiserende læge?

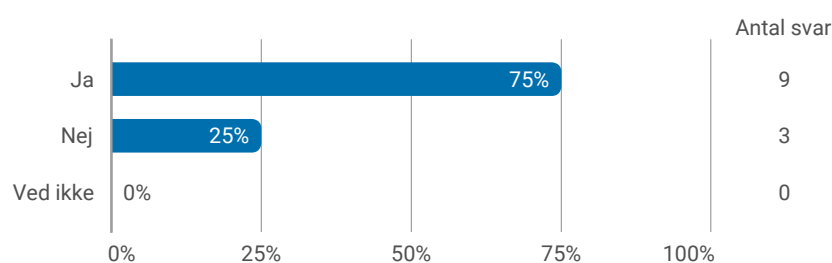

| Uddyb venligst, hvordan du blev henvist til hospital.                                                                           |
|---------------------------------------------------------------------------------------------------------------------------------|
| Min mand ringede selv til hospitalet og fortalte om min tilstand. På den måde blev vi klar over, at der fandtes en kvalmeklinik |
| Jeg ringede selv til akutmodtagelsen                                                                                            |

| Hvis du har kommentarer eller forslag til forbedring/ændring af behandlingen af hyperemesis gravidarum hos din praktiserende læge, kan du skrive dem her:                                                                                                                           |
|-------------------------------------------------------------------------------------------------------------------------------------------------------------------------------------------------------------------------------------------------------------------------------------|
| Synes hun har gjort hvad hun kunne, hun var ikke bange for at prøve en masse piller af med mig                                                                                                                                                                                      |
| Min læge er klar over, at jeg havde HG i sidste graviditet, men slog bare op i et system, at ondansetron ikke bør gives før andet trimester, så hun ville ikke henvise mig til hjælp på hospitalet. Det var derfor først, da det blev rigtigt slemt, at jeg kunne få en henvisning. |
| Mere information til de praktiserende læger om hyperemesis gravidarum og om kvalmeklinikken på Hillerød                                                                                                                                                                             |
| Jeg har været helt tilfreds med håndteringen fra egen læge                                                                                                                                                                                                                          |
