# Supplementary material
Source: HighWire-hosted journal article supplement (https://bmjopenquality.bmj.com/content/12/3/e002035)
Supplement: inline-supplementary-material-6 [file inline-supplementary-material-6.pdf]

# Post changes questionnaire

## Samlet status

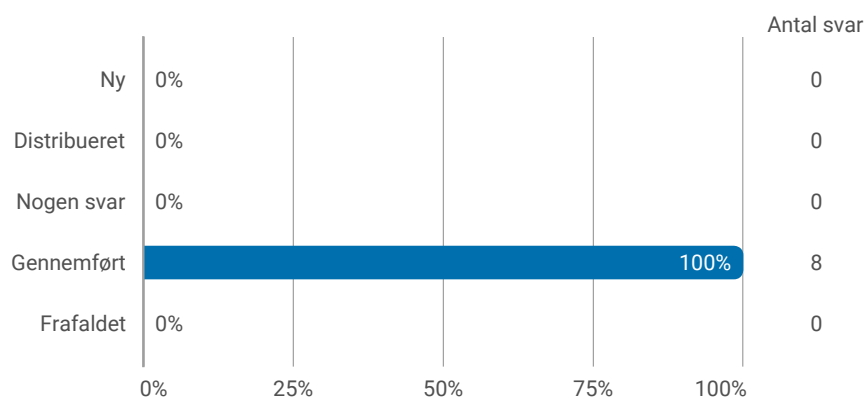

## Hvor mange uger har du været tilknyttet afdelingen grundet hyperemesis gravidarum?

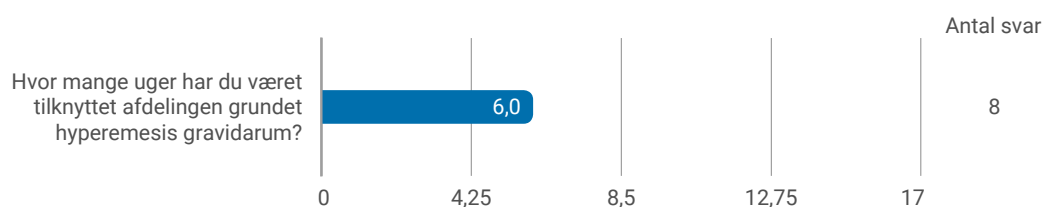

## Hvor tilfreds er du overordnet med dit forløb grundet hyperemesis gravidarum her på hospitalet?

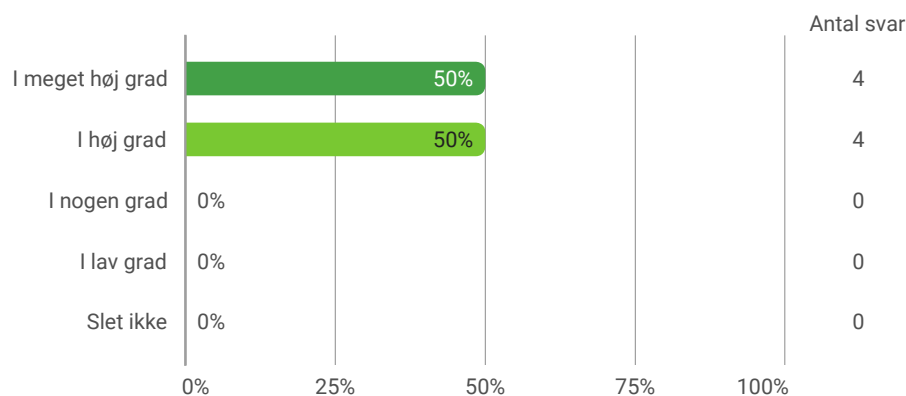

## Er personalet venligt og imødekommende?

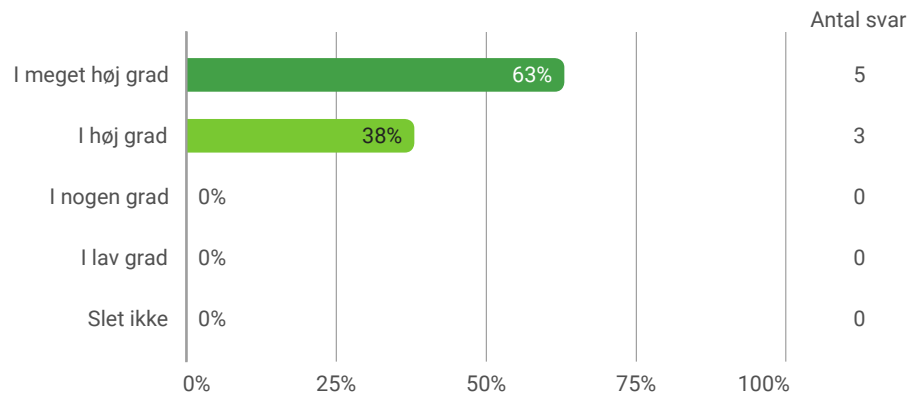

## Har personalet givet dig tilstrækkelig information til, at du er tryk ved tiden efter dit besøg/indlæggelse?

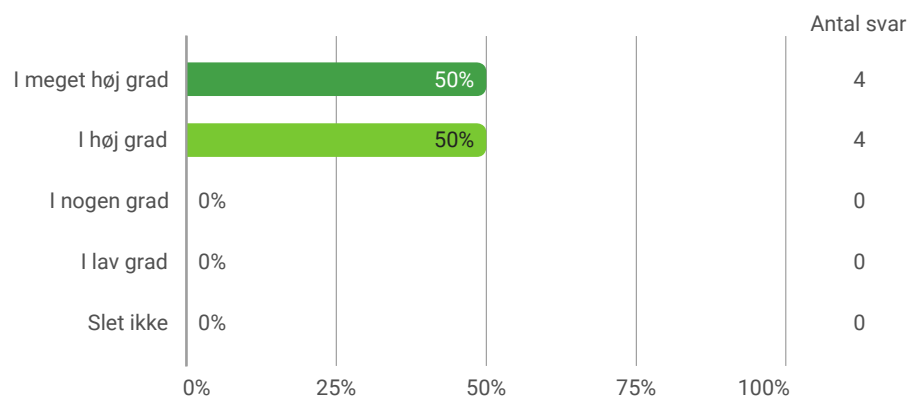

## Oplever du entydig information fra personalet?

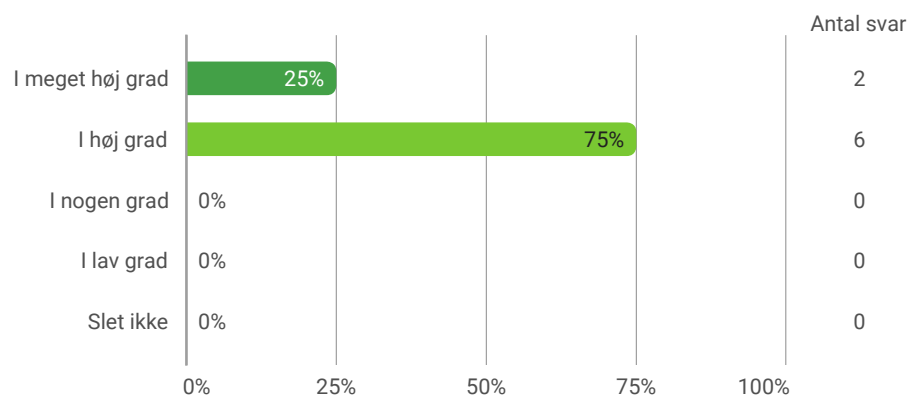

## Har du oplevet, at der lå en klar behandlingsplan?

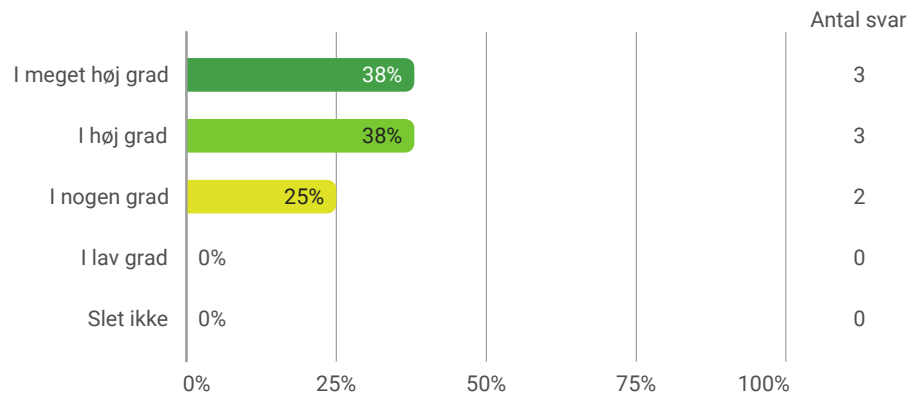

## Startede dit hospitalsforløb med, at du blev set i Gynækologisk ambulatorie af en læge og sygeplejerske, hvor du bl.a. blev skannet?

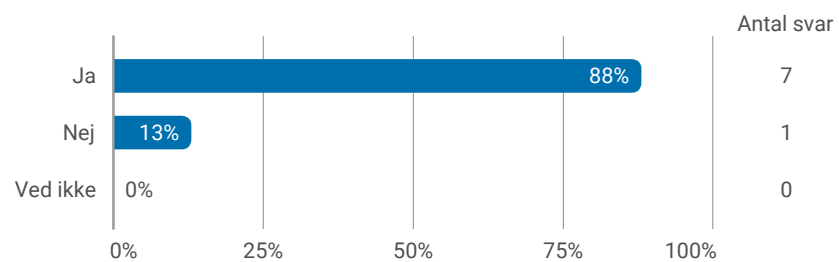

## Hvor tilfreds var du med det første besøg?

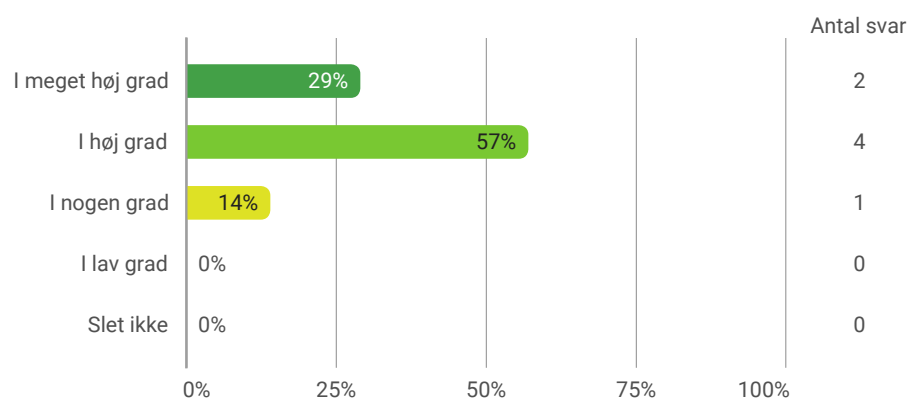

## Oplevede du, at lægen/lægerne i ambulatoriet var kompetente?

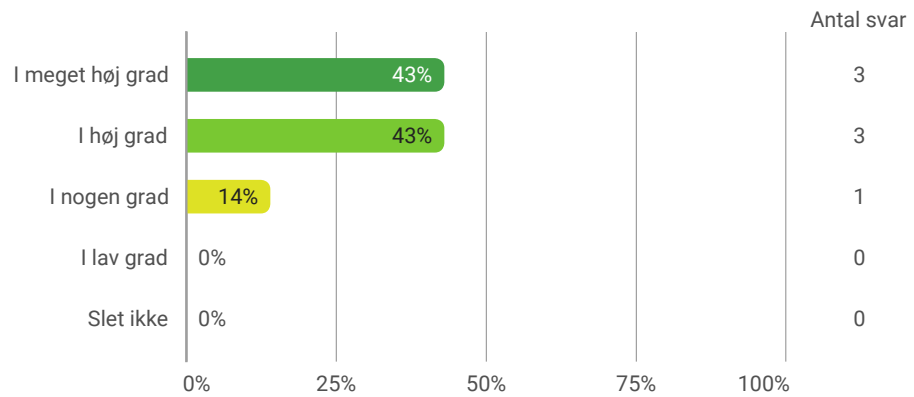

## Oplevede du, at sygeplejersken/sygeplejerskerne i ambulatoriet var kompetente?

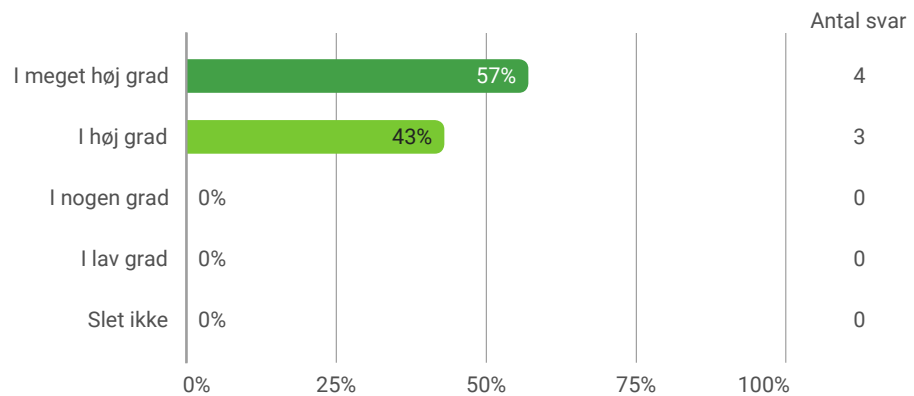

## Spurgte personalet ind til din beskrivelse af din sygdom/tilstand?

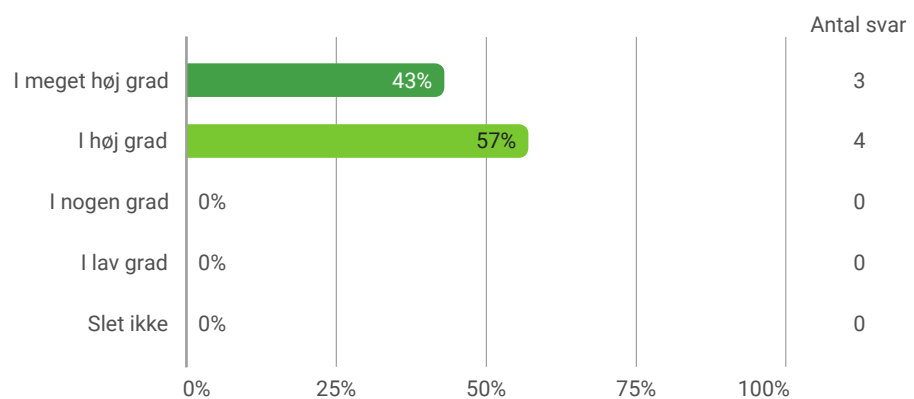

Var du med til at træffe beslutninger om din undersøgelse/behandling i det omfang, du havde behov for?

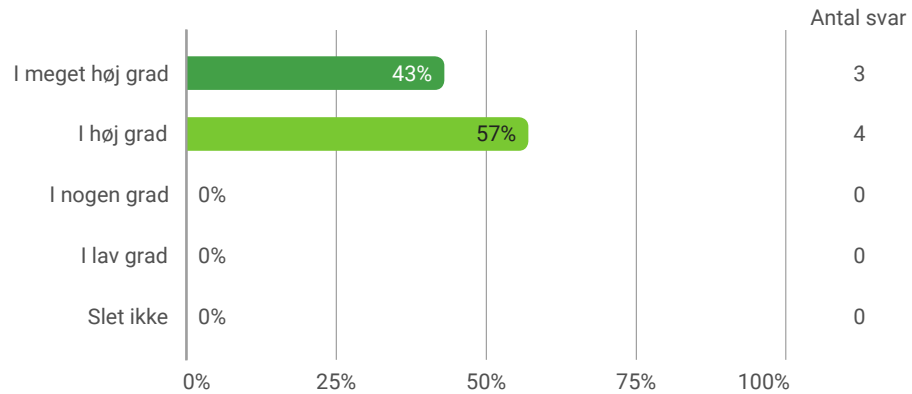

Fik du alle de informationer, du havde behov for?

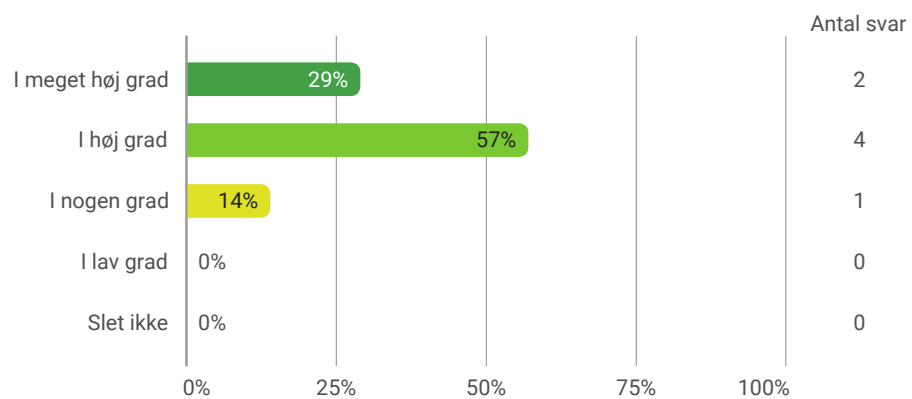

Var den mundtlige information, du fik under dit besøg, forståelig?

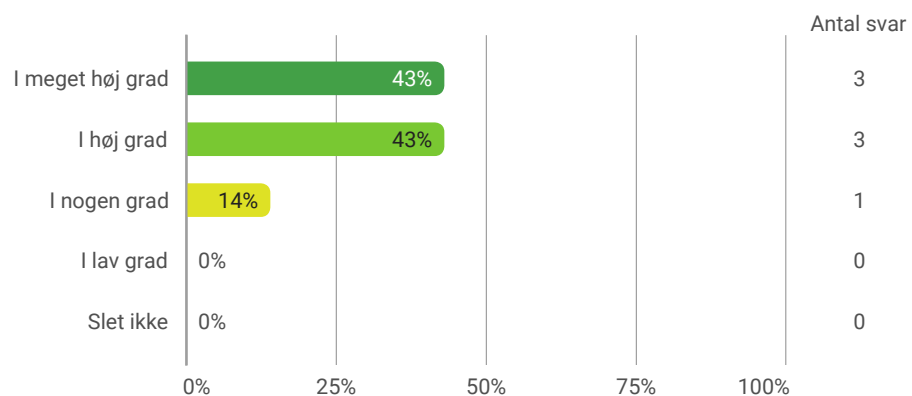

## Oplever du, at afdelingens sygeplejersker er kompetente?

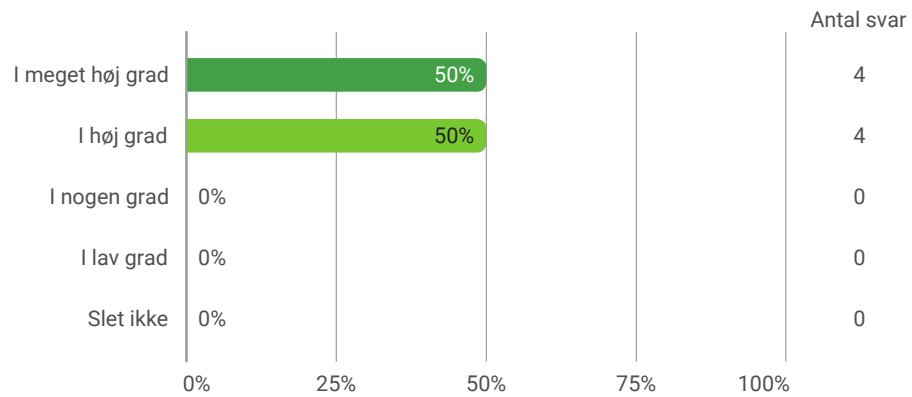

## Oplever du, at afdelingens læger er kompetente?

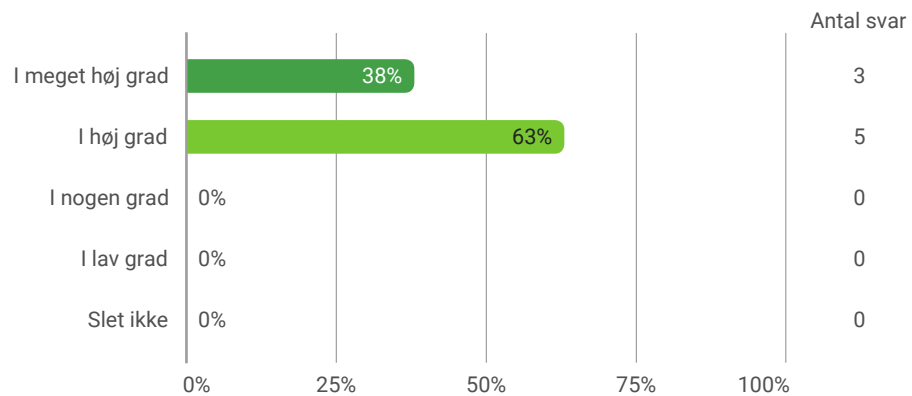

## Spørger personalet ind til din beskrivelse af din sygdom/tilstand?

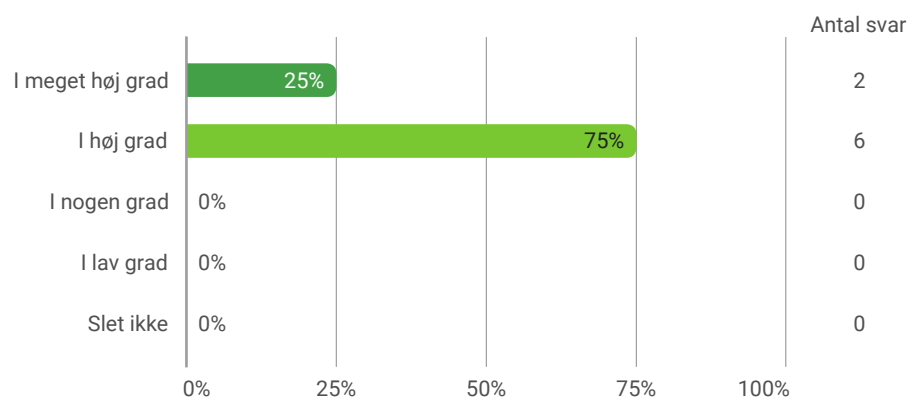

Har du været med til at træffe beslutninger om din undersøgelse/behandling i det omfang, du har haft behov for?

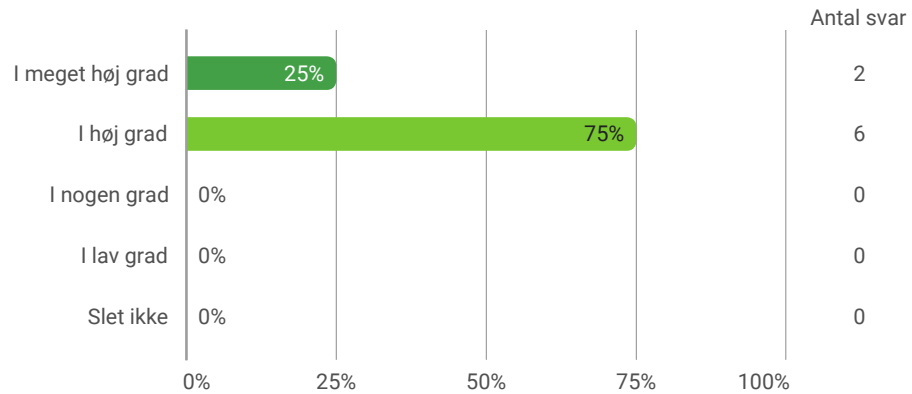

Har du fået alle de informationer, du har haft behov for?

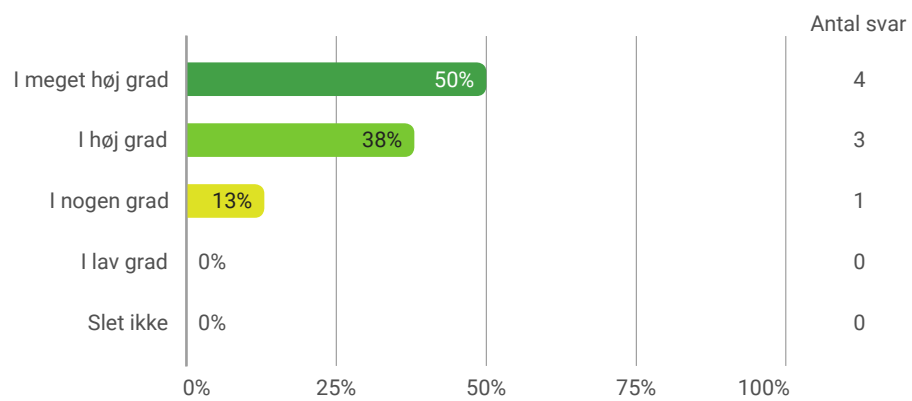

Har den mundtlige information, du har fået under dit forløb, været forståelig?

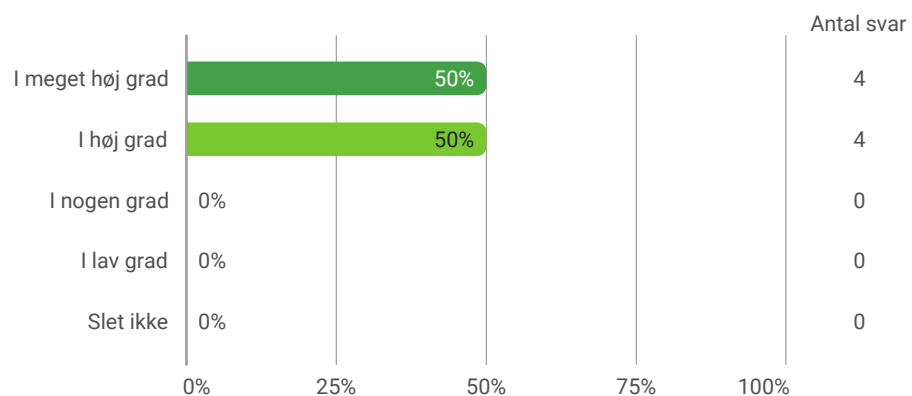

**Hvis du har kommentarer eller forslag til forbedring/ændring af behandlingen af hyperemesis gravidarum på Nordsjællands Hospital Hillerød, kan du skrive det her:**

Jeg har været meget tilfreds. Har mærket en del omsorg og god behandling fra sygeplejerskerne. Det er så trygt og rart at komme der

Har kun ros, er glad for man bliver lagt i en seng med det samme, istedet for at skal vente i venteværelset. Ydermere er jeg utrolig glad for den behandling jeg har fået, og føler mig sp tryk og hørt.

Det er trygt og fyldstgørende ved hver besøg. Obs på en tilstand og god til at reflektere og vurder forløb

**Har du henvendt dig til din praktiserende læge angående graviditeskvalme/hyperemesis gravidarum?**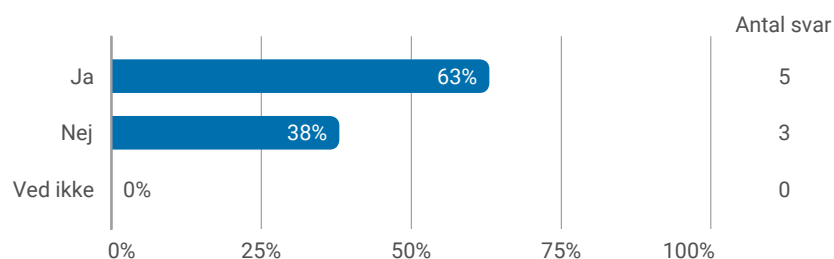**Hvis du kan uddybe, hvorfor du ikke har henvendt dig til din praktiserende læge grundet graviditeskvalme/hyperemesis gravidarum, bedes du gøre det her:**

Fordi jeg startede ud med indlæggelse på hospitalet, og derfra er blevet fulgt og lavet plan. E. L . Har været indover i forhold til sygemelding

Det gjorde jeg de 2 første gange og fik desværre ikke den hjælp jeg havde brug for.

Da jeg også havde hyperemesis i første graviditet oplevede jeg ikke så stor forståelse fra egen læge. Derfor valgte jeg at ringe 1813 for at undgå den praktiserende læges vurdering.



Hvor tilfreds var du overordnet med din kontakt til din praktiserende læge grundet graviditetskvalme/ hyperemesis gravidarum?

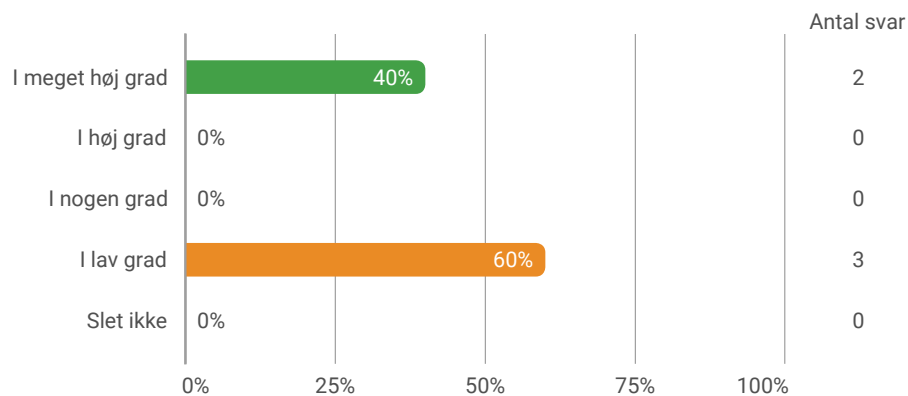

Oplevede du, at din praktiserende læge var kompetent i forhold til graviditetskvalme/hyperemesis gravidarum?

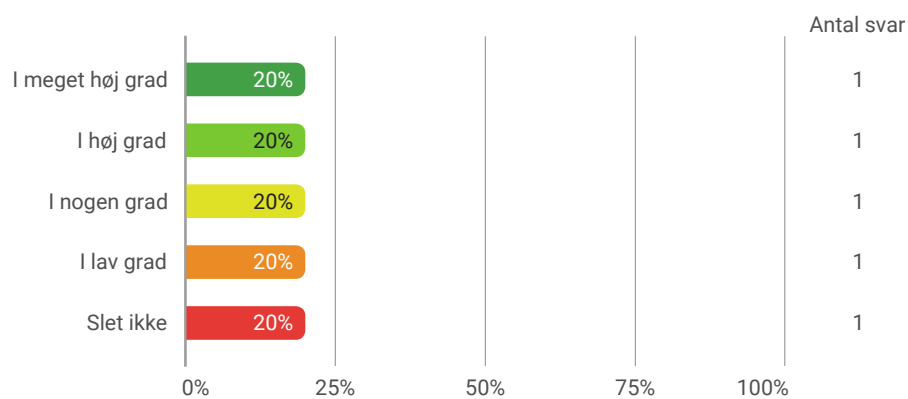

Spurgte han/hun ind til din beskrivelse af din sygdom/tilstand?

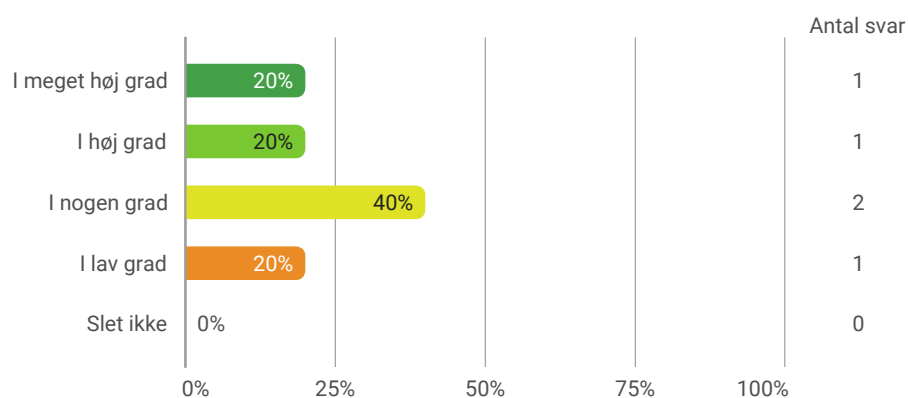

Var du med til at træffe beslutninger om din undersøgelse/behandling i det omfang, du havde behov for?

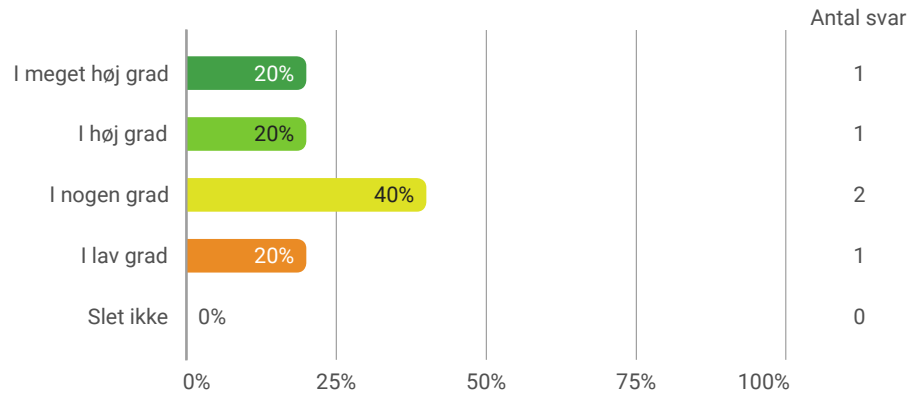

Fik du alle de informationer, du havde behov for?

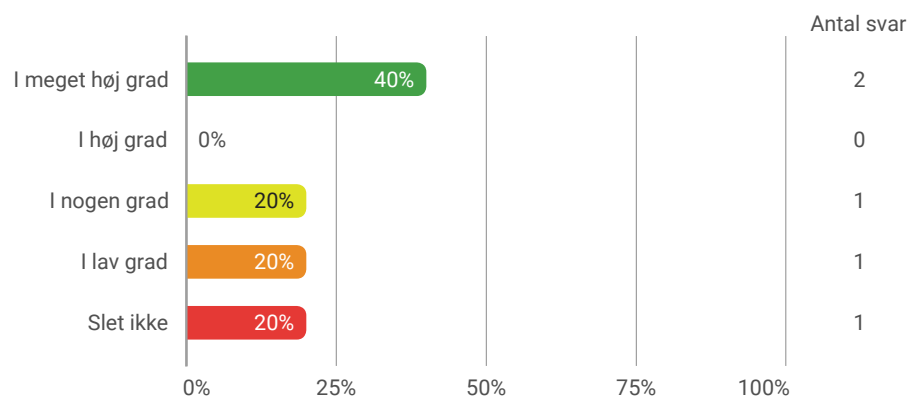

Var den mundtlige information, du fik, forståelig?

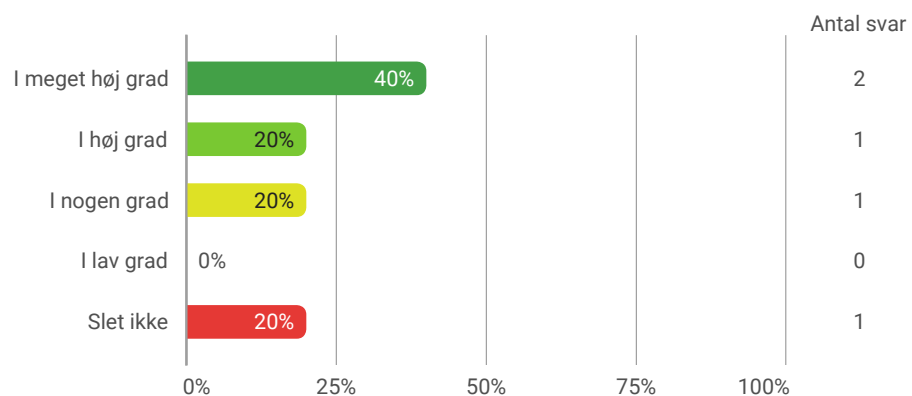

Gav din praktiserende læge dig tilstrækkelig information til, at du var tryk ved tiden efter dit besøg?

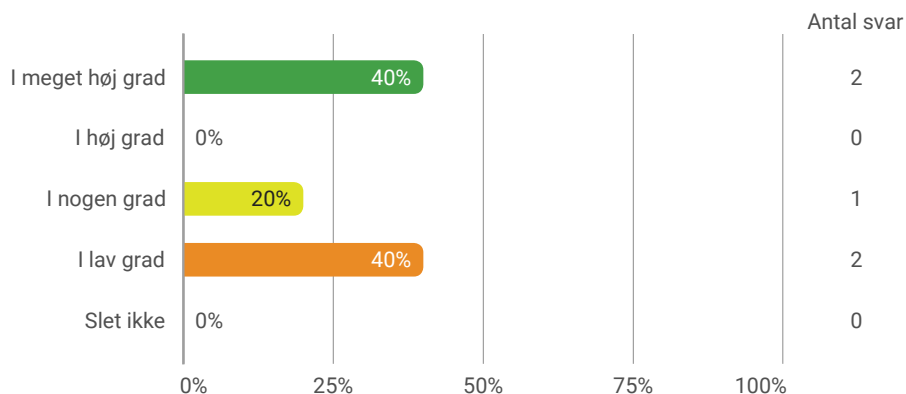

Oplevede du, at der lå en klar behandlingsplan efter dit besøg hos din praktiserende læge?

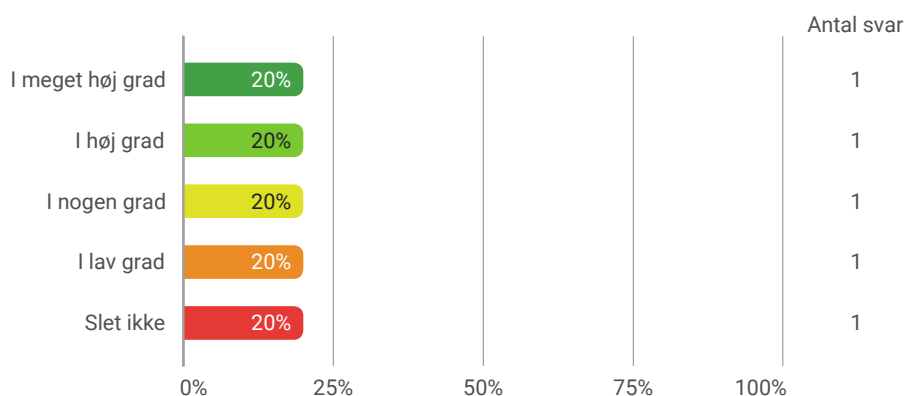

Startede du kvalmestillende medicin efter vejledning/recept fra din praktiserende læge?

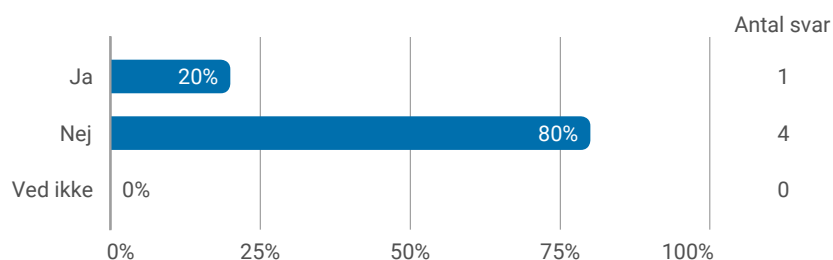

| Hvilken kvalmestillende medicin startede du efter vejledning/recept fra din praktiserende læge? |
|-------------------------------------------------------------------------------------------------|
| Ingen. Al medicin givet fra afdelingen                                                          |
| B6 og Postafen                                                                                  |
| B vitamin                                                                                       |

### Blev du henvist til hospitalet af din praktiserende læge?

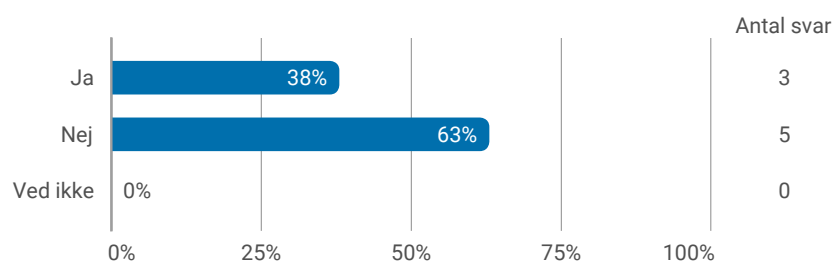

| Uddyb venligst, hvordan du blev henvist til hospital.                                                                                                                                                         |
|---------------------------------------------------------------------------------------------------------------------------------------------------------------------------------------------------------------|
| Via 1813                                                                                                                                                                                                      |
| Ringede 1813                                                                                                                                                                                                  |
| Jeg blev tilfældigt grebet af en læge i et forskningsprojekt "det første skridt", som jeg deltog i ifm nakkefoldsscanning. Hun ringede til mig på baggrund af mine svar og etablerede forløb for hyperemesis. |
| Faldt om i hjemmet efter 3 ugers mangel af føde og væske                                                                                                                                                      |
| 1813                                                                                                                                                                                                          |

**Hvis du har kommentarer eller forslag til forbedring/ændring af behandlingen af hyperemesis gravidarum hos din praktiserende læge, kan du skrive dem her:**

Sygeplejerskene i mit lægehus blev ved med enten at sige jeg skulle have fat i en specialist og hver gang jeg spurgte om at få lov til at snakke med min læge kunne jeg ikke få lov til det, da de blev ved med at mene jeg skulle gi e det en uge mere. Da jeg egentlig kom igennem til min egen læge efter næsten to uger, var hun ikke i tvilv om jeg skulle ind og have væske.

Nej, min læge kendte min historik fra sidst- sp hun tævet ikke med at henvise mig.

Jeg ville ønske min egen læge havde kendt mere til diagnosen og behandling, da det muligvis kunne have hjulpet mig 6 uger før.

Jeg føler at det er et tilfælde, at en læge "opdagede" mig og hjalp.

Jeg ville ønske de havde mere viden og forståelse. Hvis min kæreste ikke havde været mere insisterende i sidste graviditet havde jeg nok ikke endt med at få behandling. Jeg er bange for der er mange der går igennem denne ubehagelige lidelse uden hjælp, fordi de praktiserende læger ikke ved nok om det.

De skal uddannes mere indenfor dette område af gravide
